# Supplementary material
Source: HighWire-hosted journal article supplement (https://jnm.snmjournals.org/highwire/filestream/97646/field_highwire_adjunct_files/0/241877_Supplemental_Data.pdf)
Supplement: 241877_Supplemental_Data.pdf [file 241877_Supplemental_Data.pdf]

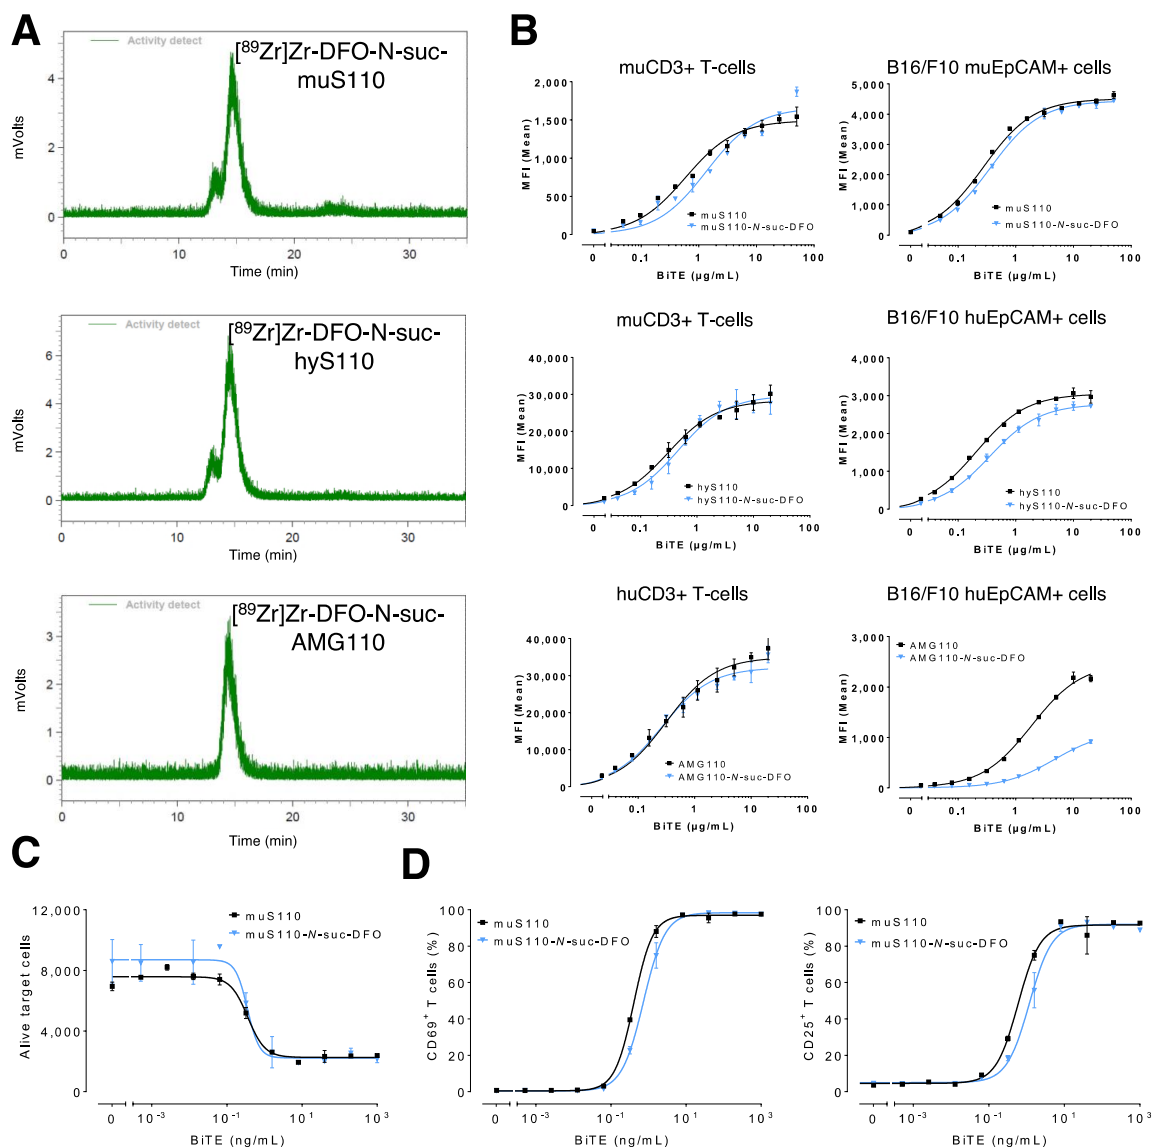

**Supplemental figure 1.** Evaluation and quality control and validation of  $[^{89}\text{Zr}]\text{Zr-DFO-N-suc-BiTE}$  molecules. **A**, Radiochemical signal of size exclusion high performance liquid chromatography chromatogram of  $[^{89}\text{Zr}]\text{Zr-DFO-N-suc-BiTE}$  antibody molecules. BiTE elutes after 15 minutes. Free  $^{89}\text{Zr}$  elutes after 24 minutes. **B**, Binding of DFO-N-suc-BiTE antibody molecules tested on murine CD3-positive T-cells and B16/F10 murine EpCAM-positive cells. Functionality assessed by cell-based assays with T-cells: Tumor

cells incubated at a ratio of 10:1. The read-outs are cytotoxicity (**C**) and T-cell activation by CD69 and CD25 expression (**D**). Data are mean  $\pm$  SD ( $n = 2$ ).

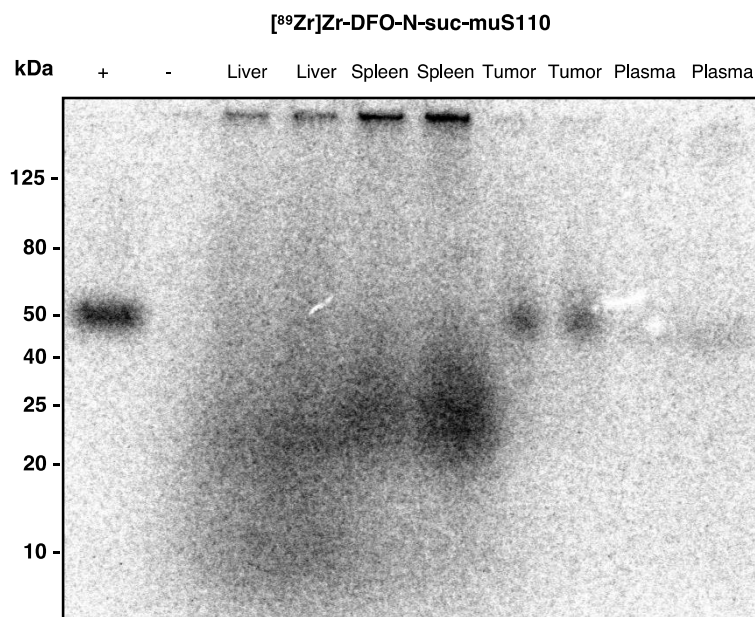

**Supplemental figure 2.** Integrity of 10  $\mu$ g [<sup>89</sup>Zr]Zr-DFO-*N*-suc-muS110 in 4T1-tumor bearing immunocompetent mice, 24 hours pi, by SDS-PAGE autoradiography. Lysates of liver spleen and tumor were loaded, as well as plasma of corresponding mice. + = [<sup>89</sup>Zr]Zr-DFO-*N*-suc-muS110, - = empty lane.

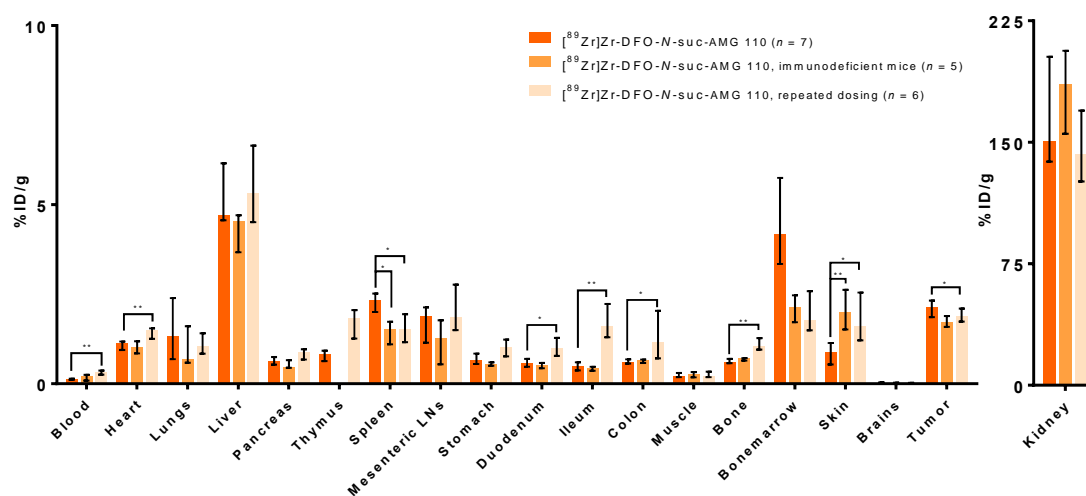

**Supplemental figure 3.** *Ex-vivo* biodistribution 24 hours after injection of 10  $\mu\text{g}$   $[^{89}\text{Zr}]\text{Zr-DFO-N-suc-AMG 110}$  of immunocompetent mice ( $n = 7$ ), immunodeficient mice ( $n = 5$ ) and repeated mus110 administration mice ( $n = 6$ ), 24 hours pi. Data is presented as median with interquartile range; \*:  $P \leq 0.05$ , \*\*:  $P \leq 0.01$ .

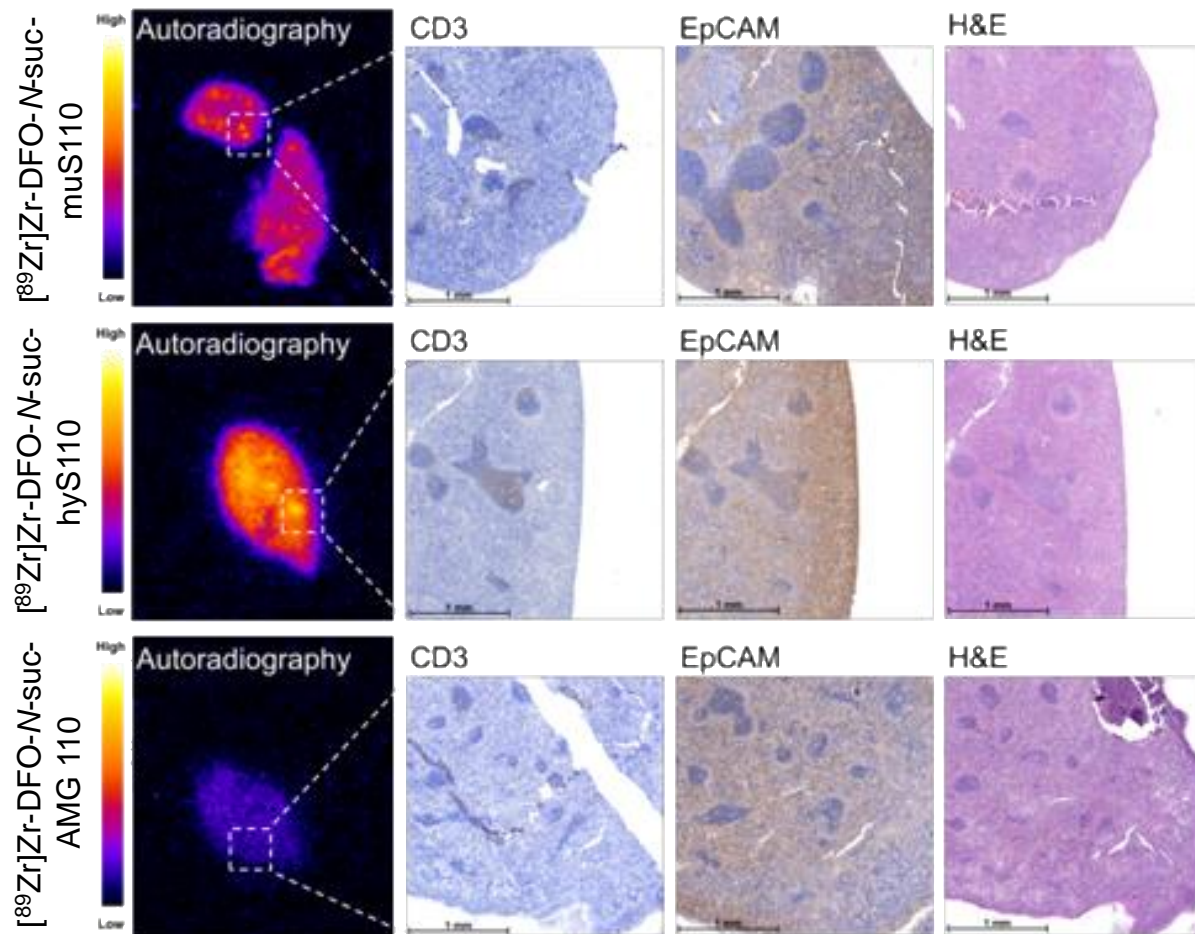

**Supplemental figure 4.** Microscopic analysis of the spleen from immunocompetent mice 24 hours after injection of 10 µg ,  $[^{89}\text{Zr}]\text{Zr-DFO-}N\text{-suc-BiTE}$  molecule. From left to right, autoradiography followed by zoomed in CD3 and EpCAM IHC and H&E. From top to bottom,  $[^{89}\text{Zr}]\text{Zr-DFO-}N\text{-suc-muS110}$ ,  $[^{89}\text{Zr}]\text{Zr-DFO-}N\text{-suc-hyS110}$  and  $[^{89}\text{Zr}]\text{Zr-DFO-}N\text{-suc-AMG 110}$ .

**A**

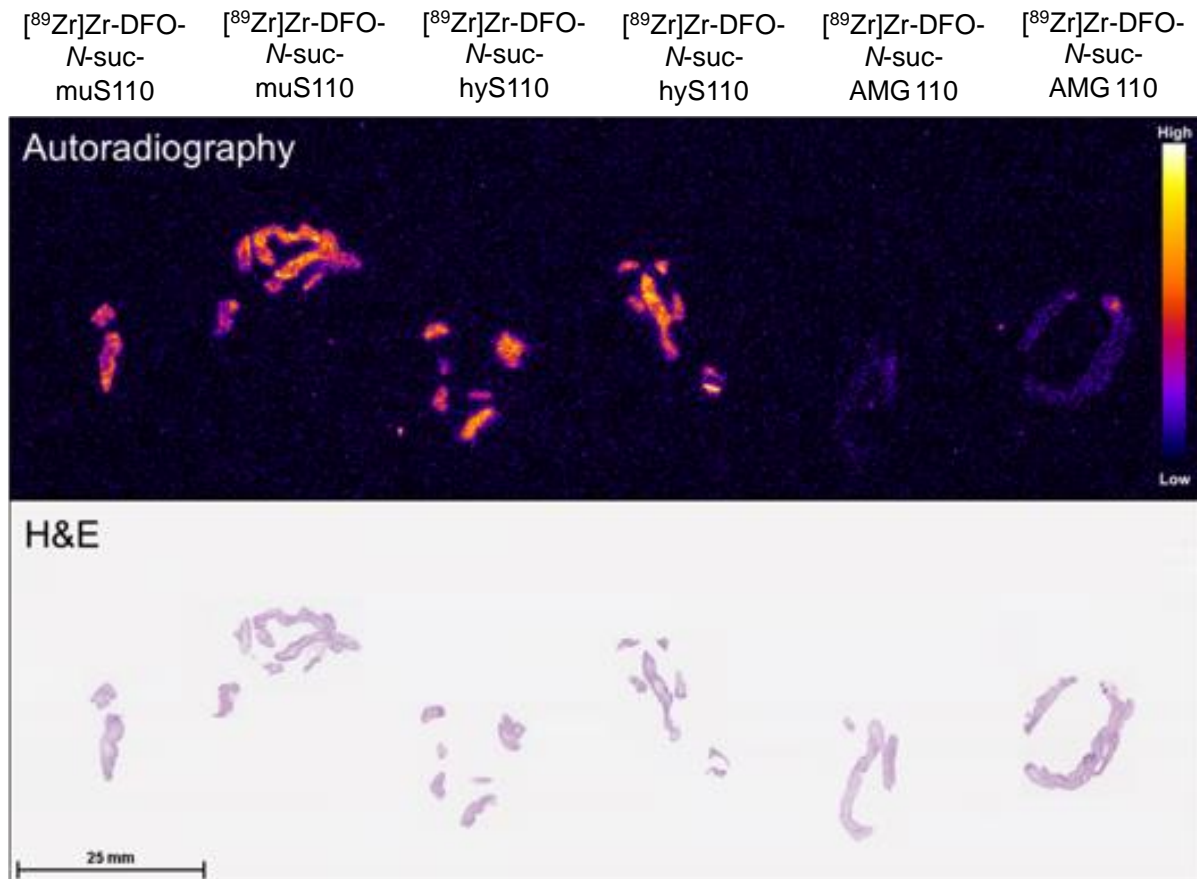

**B**

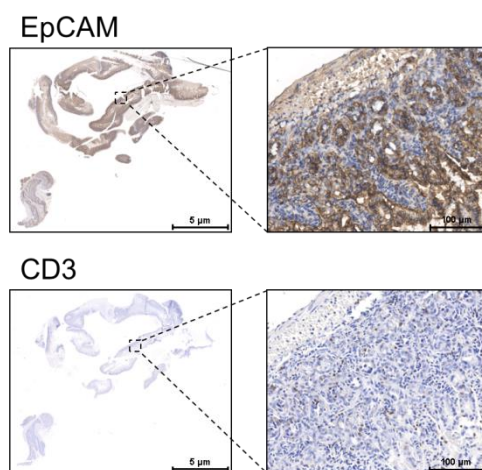

**Supplemental figure 5.** *Ex-vivo* macro and microscopic analysis of the duodenum from immunocompetent mice 24 hours after injection of 10  $\mu\text{g}$   $[^{89}\text{Zr}]\text{Zr-DFO-}N\text{-suc-BiTE}$  molecule. **A**, top panel shows an overview of the autoradiography signal. Below the

corresponding H&E stained tissue. **B**, EpCAM and CD3 staining of the duodenum showing high uniform presence of EpCAM-positive and CD3-positive cells.

**Supplemental Table 1.** % ID/g values from *ex-vivo* biodistribution of  $^{89}\text{Zr}$ -muS110 ( $n = 7$ ),  $^{89}\text{Zr}$ -AMG 110 ( $n = 7$ ) and  $^{89}\text{Zr}$ -hyS110 ( $n = 7$ ) in 4T1-tumor bearing immunocompetent mice 24 hours pi. Differences between either  $^{89}\text{Zr}$ -AMG 110 and  $^{89}\text{Zr}$ -hyS110 versus  $^{89}\text{Zr}$ -muS110 were tested with a Bonferroni-corrected Mann-Whitney U test.  $P$ -values  $\leq 0.05$  are shown.

| Tissue         | $^{89}\text{Zr}$ Zr-DFO- <i>N</i> -suc-muS110 | $^{89}\text{Zr}$ Zr-DFO- <i>N</i> -suc-AMG 110 | Difference versus-muS110 ( $P$ ) | $^{89}\text{Zr}$ Zr-DFO- <i>N</i> -suc-hyS110 | Difference versus muS110 ( $P$ ) |
|----------------|-----------------------------------------------|------------------------------------------------|----------------------------------|-----------------------------------------------|----------------------------------|
| Blood          | 0.27 (0.23 to 0.29)                           | 0.12 (0.11 to 0.13)                            | 0.001                            | 0.44 (0.34 to 0.48)                           | 0.044                            |
| Heart          | 1.10 (0.98 to 1.14)                           | 1.13 (1.02 to 1.16)                            | 0.001                            | 1.78 (1.64 to 1.95)                           | 0.001                            |
| Lung           | 1.51 (1.21 to 1.67)                           | 1.33 (0.76 to 1.93)                            | n.s.                             | 1.48 (1.16 to 1.80)                           | n.s.                             |
| Liver          | 9.18 (8.66 to 11.65)                          | 4.71 (4.58 to 5.69)                            | 0.002                            | 10.94 (10.71 to 12.26)                        | n.s.                             |
| Pancreas       | 1.54 (1.19 to 1.67)                           | 0.63 (0.56 to 0.74)                            | 0.001                            | 1.13 (1.01 to 1.20)                           | n.s.                             |
| Thymus         | 1.83 (1.78 to 2.26)                           | 0.84 (0.70 to 0.90)                            | 0.001                            | 2.48 (2.17 to 2.69)                           | n.s.                             |
| Spleen         | 6.89 (6.74 to 8.29)                           | 2.33 (2.18 to 2.43)                            | 0.002                            | 9.14 (8.72 to 10.66)                          | n.s.                             |
| Mesenteric LNs | 3.02 (2.80 to 4.16)                           | 1.90 (1.20 to 2.04)                            | 0.001                            | 6.78 (5.70 to 8.50)                           | 0.002                            |
| Stomach        | 1.74 (1.55 to 2.08)                           | 0.65 (0.57 to 0.80)                            | 0.001                            | 2.01 (1.81 to 2.34)                           | n.s.                             |
| Duodenum       | 3.66 (3.33 to 4.43)                           | 0.58 (0.49 to 0.66)                            | 0.001                            | 2.01 (1.67 to 2.44)                           | 0.001                            |
| Ileum          | 2.76 (2.45 to 3.63)                           | 0.49 (0.40 to 0.59)                            | 0.001                            | 1.87 (1.82 to 2.25)                           | 0.04                             |
| Colon          | 1.00 (0.87 to 1.24)                           | 0.61 (0.58 to 0.65)                            | 0.008                            | 1.14 (1.04 to 1.51)                           | n.s.                             |
| Muscle         | 0.25 (0.19 to 0.27)                           | 0.22 (0.19 to 0.26)                            | n.s.                             | 0.39 (0.36 to 0.48)                           | 0.008                            |
| Bone           | 0.96 (0.95 to 1.10)                           | 0.60 (0.59 to 0.66)                            | 0.001                            | 0.70 (0.57 to 1.07)                           | n.s.                             |
| Bone marrow    | 3.41 (2.43 to 7.07)                           | 4.17 (3.76 to 4.96)                            | n.s.                             | 3.86 (2.84 to 7.81)                           | n.s.                             |
| Skin           | 0.93 (0.70 to 1.22)                           | 0.88 (0.60 to 1.11)                            | n.s.                             | 1.17 (1.12 to 1.30)                           | n.s.                             |
| Brain          | 0.02 (0.02 to 0.03)                           | 0.02 (0.02 to 0.03)                            | n.s.                             | 0.02 (0.02 to 0.04)                           | n.s.                             |
| Tumor          | 1.96 (1.39 to 2.61)                           | 2.13 (1.92 to 2.21)                            | n.s.                             | 2.66 (2.51 to 3.18)                           | n.s.                             |
| Kidney         | 58.24 (57.07 to 67.49)                        | 150.57 (143.26 to 182.62)                      | 0.001                            | 72.30 (70.53 to 81.45)                        | n.s.                             |

**Supplemental Table 2.** % ID/g values from *ex-vivo* biodistribution of [<sup>89</sup>Zr]Zr-DFO-*N*-suc-muS110 (*n* = 4) and [<sup>89</sup>Zr]Zr-DFO-*N*-suc-AMG 110 (*n* = 5) in 4T1-tumor bearing immunodeficient mice 24 hours pi. Differences between [<sup>89</sup>Zr]Zr-DFO-*N*-suc-muS110 and [<sup>89</sup>Zr]Zr-DFO-*N*-suc-AMG 110 and were tested with a Mann-Whitney U test. *P*-values ≤ 0.05 are shown.

| Tissue         | [ <sup>89</sup> Zr]Zr-DFO- <i>N</i> -suc-muS110 | [ <sup>89</sup> Zr]Zr-DFO- <i>N</i> -suc-AMG 110 | Difference ( <i>P</i> ) |
|----------------|-------------------------------------------------|--------------------------------------------------|-------------------------|
| Blood          | 0.13 (0.10 to 0.18)                             | 0.20 (0.09 to 0.24)                              | n.s.                    |
| Heart          | 0.71 (0.60 to 0.80)                             | 1.03 (0.94 to 1.18)                              | n.s.                    |
| Lung           | 2.05 (1.32 to 2.71)                             | 0.69 (0.60 to 1.50)                              | n.s.                    |
| Liver          | 5.79 (4.57 to 6.80)                             | 4.54 (4.06 to 4.65)                              | n.s.                    |
| Pancreas       | 1.06 (0.96 to 1.10)                             | 0.46 (0.45 to 0.57)                              | 0.032                   |
| Spleen         | 3.37 (2.62 to 3.76)                             | 1.51 (1.19 to 1.55)                              | n.s.                    |
| Mesenteric LNs | 1.67 (1.24 to 2.07)                             | 1.52 (1.23 to 1.77)                              | n.s.                    |
| Stomach        | 0.92 (0.83 to 0.97)                             | 0.55 (0.50 to 0.56)                              | 0.016                   |
| Duodenum       | 1.61 (1.48 to 1.73)                             | 0.52 (0.44 to 0.56)                              | 0.016                   |
| Ileum          | 1.31 (1.22 to 1.48)                             | 0.42 (0.41 to 0.46)                              | 0.016                   |
| Colon          | 0.70 (0.63 to 0.74)                             | 0.64 (0.59 to 0.66)                              | n.s.                    |
| Muscle         | 0.22 (0.19 to 0.25)                             | 0.27 (0.21 to 0.31)                              | n.s.                    |
| Bone           | 0.82 (0.73 to 0.84)                             | 0.70 (0.67 to 0.71)                              | n.s.                    |
| Bone marrow    | 1.53 (1.32 to 1.60)                             | 2.14 (1.78 to 2.46)                              | n.s.                    |
| Skin           | 1.86 (1.66 to 2.04)                             | 1.98 (1.59 to 2.47)                              | n.s.                    |
| Brain          | 0.01 (0.01 to 0.02)                             | 0.02 (0.02 to 0.03)                              | n.s.                    |
| Tumor          | 1.46 (1.27 to 1.58)                             | 1.72 (1.64 to 1.74)                              | n.s.                    |
| Kidney         | 46.43 (39.41 to 53.17)                          | 185.91 (174.76 to 192.56)                        | 0.016                   |



**Supplemental Table 3.** % ID/g values from *ex-vivo* biodistribution of [<sup>89</sup>Zr]Zr-DFO-*N*-suc-muS110 (*n* = 7) and [<sup>89</sup>Zr]Zr-DFO-*N*-suc-AMG 110 (*n* = 6) in 4T1-tumor bearing immunocompetent mice 24 hours pi, after receiving 10 µg muS110 for 5 days. Differences between [<sup>89</sup>Zr]Zr-DFO-*N*-suc-muS110 and [<sup>89</sup>Zr]Zr-DFO-*N*-suc-AMG 110 and were tested with a Mann-Whitney U test. *P*-values ≤ 0.05 are shown.

| Tissue         | [ <sup>89</sup> Zr]Zr-DFO- <i>N</i> -suc-muS110 | [ <sup>89</sup> Zr]Zr-DFO- <i>N</i> -suc-AMG 110 | Difference ( <i>P</i> ) |
|----------------|-------------------------------------------------|--------------------------------------------------|-------------------------|
| Blood          | 0.33 (0.24 to 0.39)                             | 0.31 (0.27 to 0.35)                              | n.s.                    |
| Heart          | 0.76 (0.71 to 0.95)                             | 1.51 (1.36 to 1.54)                              | 0.001                   |
| Lung           | 0.69 (0.66 to 0.83)                             | 1.05 (0.87 to 1.33)                              | 0.041                   |
| Liver          | 7.28 (5.56 to 8.60)                             | 5.33 (4.65 to 6.40)                              | n.s.                    |
| Pancreas       | 0.73 (0.51 to 0.90)                             | 0.88 (0.72 to 0.95)                              | n.s.                    |
| Thymus         | 2.02 (1.51 to 2.21)                             | 1.83 (1.47 to 1.95)                              | n.s.                    |
| Spleen         | 4.15 (3.92 to 5.07)                             | 1.53 (1.26 to 1.83)                              | 0.001                   |
| Mesenteric LNs | 1.89 (1.70 to 2.38)                             | 1.87 (1.53 to 2.57)                              | n.s.                    |
| Stomach        | 0.85 (0.83 to 1.02)                             | 1.02 (0.86 to 1.17)                              | n.s.                    |
| Duodenum       | 1.46 (1.34 to 1.72)                             | 1.00 (0.87 to 1.15)                              | 0.022                   |
| Ileum          | 1.24 (1.02 to 1.45)                             | 1.62 (1.34 to 2.02)                              | n.s.                    |
| Colon          | 0.64 (0.61 to 0.75)                             | 1.17 (0.82 to 1.37)                              | 0.022                   |
| Muscle         | 0.18 (0.15 to 0.23)                             | 0.22 (0.19 to 0.29)                              | n.s.                    |
| Bone           | 1.07 (0.95 to 1.23)                             | 1.06 (0.99 to 1.21)                              | n.s.                    |
| Bone marrow    | 1.76 (1.40 to 2.07)                             | 1.78 (1.58 to 1.99)                              | n.s.                    |
| Skin           | 0.92 (0.79 to 1.12)                             | 1.60 (1.33 to 2.25)                              | 0.014                   |
| Brain          | 0.02 (0.02 to 0.03)                             | 0.02 (0.02 to 0.02)                              | n.s.                    |
| Tumor          | 1.38 (1.09 to 1.43)                             | 1.89 (1.82 to 2.00)                              | 0.001                   |
| Kidney         | 65.01 (52.31 to 67.98)                          | 142.74 (137.14 to 157.45)                        | 0.001                   |

**Supplemental Table 4.** % ID/g values from ex-vivo biodistribution comparing 10 µg [<sup>89</sup>Zr]Zr-DFO-*N*-suc-muS110 to immunocompetent mice (*n* = 7), immunodeficient mice (*n* = 4) and repeated muS110 administration mice (*n* = 7), 24 hours pi. Differences between either the immunodeficient mice and the repeated muS110 administration group versus the immunocompetent mice were tested with a Bonferroni-corrected Mann-Whitney U test. *P*-values ≤ 0.05 are shown.

| Tissue         | [ <sup>89</sup> Zr]Zr-DFO- <i>N</i> -suc-muS110 (immunocompetent) | [ <sup>89</sup> Zr]Zr-DFO- <i>N</i> -suc-muS110 (Immunodeficient) | Difference versus immunocompetent ( <i>P</i> ) | [ <sup>89</sup> Zr]Zr-DFO- <i>N</i> -suc-muS110 (repeated dosing) | Difference versus immunocompetent ( <i>P</i> ) |
|----------------|-------------------------------------------------------------------|-------------------------------------------------------------------|------------------------------------------------|-------------------------------------------------------------------|------------------------------------------------|
| Blood          | 0.27 (0.23 to 0.29)                                               | 0.13 (0.10 to 0.18)                                               | n.s.                                           | 0.33 (0.24 to 0.39)                                               | n.s.                                           |
| Heart          | 1.10 (0.98 to 1.14)                                               | 0.71 (0.60 to 0.80)                                               | 0.024                                          | 0.76 (0.71 to 0.95)                                               | n.s.                                           |
| Lung           | 1.51 (1.21 to 1.67)                                               | 2.05 (1.32 to 2.71)                                               | n.s.                                           | 0.69 (0.66 to 0.83)                                               | 0.002                                          |
| Liver          | 9.18 (8.66 to 11.65)                                              | 5.79 (4.57 to 6.80)                                               | 0.024                                          | 7.28 (5.56 to 8.60)                                               | n.s.                                           |
| Pancreas       | 1.54 (1.19 to 1.67)                                               | 1.06 (0.96 to 1.10)                                               | n.s.                                           | 0.73 (0.51 to 0.90)                                               | 0.004                                          |
| Spleen         | 6.89 (6.74 to 8.29)                                               | 1.67 (1.24 to 2.07)                                               | 0.012                                          | 4.15 (3.92 to 5.07)                                               | 0.001                                          |
| Mesenteric LNs | 3.02 (2.80 to 4.16)                                               | 0.92 (0.83 to 0.97)                                               | 0.012                                          | 1.89 (1.70 to 2.38)                                               | 0.001                                          |
| Stomach        | 1.74 (1.55 to 2.08)                                               | 1.61 (1.48 to 1.73)                                               | 0.024                                          | 0.85 (0.83 to 1.02)                                               | 0.004                                          |
| Duodenum       | 3.66 (3.33 to 4.43)                                               | 1.31 (1.22 to 1.48)                                               | 0.012                                          | 1.46 (1.34 to 1.72)                                               | 0.001                                          |
| Ileum          | 2.76 (2.45 to 3.63)                                               | 0.70 (0.63 to 0.74)                                               | 0.012                                          | 1.24 (1.02 to 1.45)                                               | 0.001                                          |
| Colon          | 1.00 (0.87 to 1.24)                                               | 0.22 (0.19 to 0.25)                                               | n.s.                                           | 0.64 (0.61 to 0.75)                                               | 0.022                                          |
| Muscle         | 0.25 (0.19 to 0.27)                                               | 0.82 (0.73 to 0.84)                                               | n.s.                                           | 0.18 (0.15 to 0.23)                                               | n.s.                                           |
| Bone           | 0.96 (0.95 to 1.10)                                               | 1.53 (1.32 to 1.60)                                               | n.s.                                           | 1.07 (0.95 to 1.23)                                               | n.s.                                           |
| Bone marrow    | 3.41 (2.43 to 7.07)                                               | 1.86 (1.66 to 2.04)                                               | 0.012                                          | 1.76 (1.40 to 2.07)                                               | 0.014                                          |
| Skin           | 0.93 (0.70 to 1.22)                                               | 0.01 (0.01 to 0.02)                                               | 0.024                                          | 0.92 (0.79 to 1.12)                                               | n.s.                                           |
| Brain          | 0.02 (0.02 to 0.03)                                               | 1.46 (1.27 to 1.58)                                               | n.s.                                           | 0.02 (0.02 to 0.03)                                               | n.s.                                           |
| Tumor          | 1.96 (1.39 to 2.61)                                               | 46.43 (39.41 to 53.17)                                            | n.s.                                           | 1.38 (1.09 to 1.43)                                               | n.s.                                           |
| Kidney         | 58.24 (57.07 to 67.49)                                            | 0.13 (0.10 to 0.18)                                               | 0.048                                          | 65.01 (52.31 to 67.98)                                            | n.s.                                           |

**Supplemental Table 5.** % ID/g values from ex-vivo biodistribution comparing 10 µg [<sup>89</sup>Zr]Zr-DFO-*N*-suc-AMG 110 to immunocompetent mice (*n* = 7), immunodeficient mice (*n* = 4) and repeated mus110 administration mice (*n* = 6), 24 hours pi. Differences between either the immunodeficient mice and the repeated muS110 administration group versus the immunocompetent mice were tested with a Bonferroni-corrected Mann-Whitney U test. *P*-values ≤ 0.05 are shown.

| Tissue         | [ <sup>89</sup> Zr]Zr-DFO- <i>N</i> -suc-AMG 110 (immunocompetent) | [ <sup>89</sup> Zr]Zr-DFO- <i>N</i> -suc-AMG 110 (Immunodeficient) | Difference versus immunocompetent ( <i>P</i> ) | [ <sup>89</sup> Zr]Zr-DFO- <i>N</i> -suc-AMG 110 (repeated dosing) | Difference versus immunocompetent ( <i>P</i> ) |
|----------------|--------------------------------------------------------------------|--------------------------------------------------------------------|------------------------------------------------|--------------------------------------------------------------------|------------------------------------------------|
| Blood          | 0.12 (0.11 to 0.13)                                                | 0.20 (0.09 to 0.24)                                                | n.s.                                           | 0.31 (0.27 to 0.35)                                                | 0.002                                          |
| Heart          | 1.13 (1.02 to 1.16)                                                | 1.03 (0.94 to 1.18)                                                | n.s.                                           | 1.51 (1.36 to 1.54)                                                | 0.044                                          |
| Lung           | 1.33 (0.76 to 1.93)                                                | 0.69 (0.60 to 1.50)                                                | n.s.                                           | 1.05 (0.87 to 1.33)                                                | n.s.                                           |
| Liver          | 4.71 (4.58 to 5.69)                                                | 4.54 (4.06 to 4.65)                                                | n.s.                                           | 5.33 (4.65 to 6.40)                                                | n.s.                                           |
| Pancreas       | 0.63 (0.56 to 0.74)                                                | 0.46 (0.45 to 0.57)                                                | n.s.                                           | 0.88 (0.72 to 0.95)                                                | n.s.                                           |
| Spleen         | 2.33 (2.18 to 2.43)                                                | 1.51 (1.19 to 1.55)                                                | 0.017                                          | 1.53 (1.26 to 1.83)                                                | 0.017                                          |
| Mesenteric LNs | 1.90 (1.20 to 2.04)                                                | 1.52 (1.23 to 1.77)                                                | n.s.                                           | 1.87 (1.53 to 2.57)                                                | n.s.                                           |
| Stomach        | 0.65 (0.57 to 0.80)                                                | 0.55 (0.50 to 0.56)                                                | n.s.                                           | 1.02 (0.86 to 1.17)                                                | n.s.                                           |
| Duodenum       | 0.58 (0.49 to 0.66)                                                | 0.52 (0.44 to 0.56)                                                | n.s.                                           | 1.00 (0.87 to 1.15)                                                | 0.028                                          |
| Ileum          | 0.49 (0.40 to 0.59)                                                | 0.42 (0.41 to 0.46)                                                | n.s.                                           | 1.62 (1.34 to 2.02)                                                | 0.002                                          |
| Colon          | 0.61 (0.58 to 0.65)                                                | 0.64 (0.59 to 0.66)                                                | n.s.                                           | 1.17 (0.82 to 1.37)                                                | 0.016                                          |
| Muscle         | 0.22 (0.19 to 0.26)                                                | 0.27 (0.21 to 0.31)                                                | n.s.                                           | 0.22 (0.19 to 0.29)                                                | n.s.                                           |
| Bone           | 0.60 (0.59 to 0.66)                                                | 0.70 (0.67 to 0.71)                                                | n.s.                                           | 1.06 (0.99 to 1.21)                                                | 0.002                                          |
| Bone marrow    | 4.17 (3.76 to 4.96)                                                | 2.14 (1.78 to 2.46)                                                | n.s.                                           | 1.78 (1.58 to 1.99)                                                | n.s.                                           |
| Skin           | 0.88 (0.60 to 1.11)                                                | 1.98 (1.59 to 2.47)                                                | 0.005                                          | 1.60 (1.33 to 2.25)                                                | 0.022                                          |
| Brain          | 0.02 (0.02 to 0.03)                                                | 0.02 (0.02 to 0.03)                                                | n.s.                                           | 0.02 (0.02 to 0.02)                                                | n.s.                                           |
| Tumor          | 2.13 (1.92 to 2.21)                                                | 1.72 (1.64 to 1.74)                                                | 0.034                                          | 1.89 (1.82 to 2.00)                                                | n.s.                                           |
| Kidney         | 150.57 (143.26 to 182.62)                                          | 185.91 (174.76 to 192.56)                                          | n.s.                                           | 142.74 (137.14 to 157.45)                                          | n.s.                                           |
